# Supplementary material for: Consumers Associate High-Quality (Fine) Wines with Complexity, Persistence, and Unpleasant Emotional Responses
Source: MDPI journal article supplement (doi:10.3390/foods9040452), 2020-04-08
Supplement: s1 [file s1]

**Table 1S.** Coefficients of correlation (Pearson) found between the variables of the Optimized Descriptive Profile (ODP).

| Variables                          | Smell intensity | Smell complexity | Mouth Thermal perception | Body         | Astringency | Persistence | Evolution of the wine in the glass |
|------------------------------------|-----------------|------------------|--------------------------|--------------|-------------|-------------|------------------------------------|
| Smell complexity                   | 0.016           | 1                |                          |              |             |             |                                    |
| Mouth thermal perception           | 0.445           | <b>0.892</b>     | 1                        |              |             |             |                                    |
| Body                               | 0.013           | 0.812            | 0.731                    | 1            |             |             |                                    |
| Astringency                        | 0.348           | 0.826            | <b>0.928</b>             | 0.855        | 1           |             |                                    |
| Persistence                        | -0.139          | 0.692            | 0.559                    | <b>0.974</b> | 0.741       | 1           |                                    |
| Evolution of the wine in the glass | 0.011           | <b>0.996</b>     | 0.876                    | 0.775        | 0.780       | 0.650       | 1                                  |
| Duration of the wine fragrance     | 0.518           | 0.843            | <b>0.946</b>             | 0.664        | 0.796       | 0.485       | 0.852                              |

Note: Values in bold are different from 0 with a significance level  $\alpha = 0.05$ .

**Table 2S.** Coefficients of correlation (Pearson) found between the variables (attributes) of the emotional tasting sheet.

| Variables                          | Color        | Initial<br>Impression | Smell<br>Intensity | Complexity    | Expectation<br>for the<br>mouth | Impression<br>in relation to<br>odor | Thermal<br>perception | Body         | Astringency | Persistence  | Overall<br>taste<br>evaluation | Evolution<br>of the<br>wine in the<br>glass | Duration of<br>the wine<br>fragrance |
|------------------------------------|--------------|-----------------------|--------------------|---------------|---------------------------------|--------------------------------------|-----------------------|--------------|-------------|--------------|--------------------------------|---------------------------------------------|--------------------------------------|
| Initial Impression                 | <b>0.908</b> |                       |                    |               |                                 |                                      |                       |              |             |              |                                |                                             |                                      |
| Smell Intensity                    | -0.292       | -0.488                |                    |               |                                 |                                      |                       |              |             |              |                                |                                             |                                      |
| Complexity                         | -0.626       | <b>-0.880</b>         | 0.763              |               |                                 |                                      |                       |              |             |              |                                |                                             |                                      |
| Expectation for the mouth          | <b>0.927</b> | <b>0.990</b>          | -0.362             | -0.816        |                                 |                                      |                       |              |             |              |                                |                                             |                                      |
| Impression in relation to odor     | 0.820        | 0.864                 | -0.680             | -0.804        | 0.805                           |                                      |                       |              |             |              |                                |                                             |                                      |
| Thermal perception                 | -0.184       | -0.534                | 0.868              | 0.871         | -0.430                          | -0.533                               |                       |              |             |              |                                |                                             |                                      |
| Body                               | -0.281       | -0.606                | <b>0.898</b>       | <b>0.909</b>  | -0.502                          | -0.626                               | <b>0.993</b>          |              |             |              |                                |                                             |                                      |
| Astringency                        | -0.362       | -0.710                | 0.453              | 0.863         | -0.675                          | -0.525                               | 0.781                 | 0.781        |             |              |                                |                                             |                                      |
| Persistence                        | -0.078       | -0.403                | 0.876              | 0.763         | -0.279                          | -0.575                               | <b>0.928</b>          | <b>0.932</b> | 0.685       |              |                                |                                             |                                      |
| Overall taste evaluation           | 0.817        | <b>0.964</b>          | -0.677             | <b>-0.949</b> | <b>0.917</b>                    | <b>0.931</b>                         | -0.691                | -0.761       | -0.755      | -0.621       |                                |                                             |                                      |
| Evolution of the wine in the glass | 0.393        | 0.224                 | 0.736              | 0.187         | 0.359                           | -0.111                               | 0.573                 | 0.551        | 0.005       | 0.708        | -0.026                         |                                             |                                      |
| Duration of the wine fragrance     | 0.104        | -0.153                | <b>0.918</b>       | 0.558         | -0.014                          | -0.396                               | 0.842                 | 0.835        | 0.369       | <b>0.911</b> | -0.393                         | <b>0.918</b>                                |                                      |
| Global evaluation                  | 0.853        | <b>0.992</b>          | -0.571             | <b>-0.934</b> | <b>0.967</b>                    | 0.861                                | -0.639                | -0.702       | -0.769      | -0.505       | <b>0.981</b>                   | 0.123                                       | -0.263                               |

Notes: Values in bold are significant (p<0.05)

**Table 3S.** Coefficients of correlation (Pearson) determination found between the variables (ODP x Consumers).

| Variables                          | Smell Intensity | Complexity | Thermal perception | Body  | Astringency | Persistence | Evolution of the wine in the glass | Duration of the wine fragrance |
|------------------------------------|-----------------|------------|--------------------|-------|-------------|-------------|------------------------------------|--------------------------------|
| Color                              | 0.099           | 0.152      | 0.058              | 0.016 | 0.008       | 0.029       | 0.176                              | 0.016                          |
| Initial Impression                 | 0.132           | 0.479      | 0.236              | 0.086 | 0.169       | 0.066       | 0.481                              | 0.120                          |
| Smell Intensity                    | 0.300           | 0.690      | 0.975              | 0.399 | 0.821       | 0.241       | 0.657                              | 0.861                          |
| Complexity                         | 0.015           | 0.856      | 0.628              | 0.475 | 0.604       | 0.397       | 0.807                              | 0.437                          |
| Expectation for the mouth          | 0.221           | 0.353      | 0.127              | 0.041 | 0.088       | 0.035       | 0.355                              | 0.044                          |
| Impression in relation to odor     | 0.001           | 0.589      | 0.450              | 0.064 | 0.196       | 0.025       | 0.659                              | 0.419                          |
| Thermal perception                 | 0.034           | 0.842      | 0.838              | 0.830 | 0.947       | 0.703       | 0.747                              | 0.659                          |
| Body                               | 0.035           | 0.894      | 0.880              | 0.753 | 0.921       | 0.618       | 0.814                              | 0.703                          |
| Astringency                        | 0.200           | 0.704      | 0.302              | 0.657 | 0.389       | 0.695       | 0.648                              | 0.207                          |
| Persistence                        | 0.107           | 0.874      | 0.886              | 0.764 | 0.796       | 0.621       | 0.846                              | 0.895                          |
| Overall taste evaluation           | 0.030           | 0.717      | 0.472              | 0.205 | 0.338       | 0.151       | 0.726                              | 0.341                          |
| Evolution of the wine in the glass | 0.745           | 0.188      | 0.546              | 0.271 | 0.481       | 0.158       | 0.174                              | 0.639                          |
| Duration of the wine fragrance     | 0.439           | 0.550      | 0.879              | 0.548 | 0.816       | 0.381       | 0.511                              | 0.876                          |
| Global evaluation                  | 0.097           | 0.589      | 0.332              | 0.167 | 0.273       | 0.134       | 0.576                              | 0.187                          |

Notes: Values in bold are significant ( $p < 0.05$ )

**Figure S1.** Final emotional tasting sheet and CATA list of attributes produced after the completion and analysis of the focus group discussions and that was further used in the consumer panel.

| TASTING SHEET                                                                                                                                                                                                               |                                       |                                                   |                   |                     |
|-----------------------------------------------------------------------------------------------------------------------------------------------------------------------------------------------------------------------------|---------------------------------------|---------------------------------------------------|-------------------|---------------------|
| <b>Name:</b>                                                                                                                                                                                                                |                                       | Male ( ) /Female ( )                              |                   | <b>Age:</b>         |
| <b>SCALE 1 - 2 - 3 - 4 - 5</b>                                                                                                                                                                                              |                                       |                                                   |                   | <b>Wine n°:</b>     |
| You have received a sample of wine. Please OBSERVE, CHECK and PROVE the sample and indicate how much you liked or disliked, using the scales below, which vary from 1 to 5, according to the description of each attribute: |                                       |                                                   |                   |                     |
| <b>Color</b>                                                                                                                                                                                                                |                                       |                                                   |                   |                     |
| Color                                                                                                                                                                                                                       |                                       | Dislike (1) to Like (5)                           |                   | (1) (2) (3) (4) (5) |
| <b>Olfactory Evaluation (Nose)</b>                                                                                                                                                                                          |                                       |                                                   |                   |                     |
| Initial Impression                                                                                                                                                                                                          |                                       | Distaste (1) to Attraction (5)                    |                   | (1) (2) (3) (4) (5) |
| <i>Intensity (Odor)</i>                                                                                                                                                                                                     |                                       | Weak (1) to Strong (5)                            |                   | (1) (2) (3) (4) (5) |
| Complexity                                                                                                                                                                                                                  |                                       | Easy (1) to Difficult to describe (5)             |                   | (1) (2) (3) (4) (5) |
| Expectation for the mouth                                                                                                                                                                                                   |                                       | Low (1) to High (5)                               |                   | (1) (2) (3) (4) (5) |
| <b>Taste Evaluation (Mouth)</b>                                                                                                                                                                                             |                                       |                                                   |                   |                     |
| Impression in relation to odor                                                                                                                                                                                              |                                       | <i>Disappointing (1) to Surprisingly good (5)</i> |                   | (1) (2) (3) (4) (5) |
| <i>Taste Perception</i>                                                                                                                                                                                                     | <i>Fresh (1) to Hot (5)</i>           | <i>Fresh (1) to Hot (5)</i>                       |                   | (1) (2) (3) (4) (5) |
|                                                                                                                                                                                                                             | <i>Light (1) to Full-bodied (5)</i>   | <i>Light (1) to Full-bodied (5)</i>               |                   | (1) (2) (3) (4) (5) |
|                                                                                                                                                                                                                             | <i>Smooth (1) to Rough (5)</i>        | <i>Smooth (1) to Rough (5)</i>                    |                   | (1) (2) (3) (4) (5) |
| <i>Final Perception</i>                                                                                                                                                                                                     | <i>Short (1) to Long (5)</i>          | <i>Short (1) to Long (5)</i>                      |                   | (1) (2) (3) (4) (5) |
|                                                                                                                                                                                                                             | <i>Unpleasant (1) to Pleasant (5)</i> | <i>Unpleasant (1) to Pleasant (5)</i>             |                   | (1) (2) (3) (4) (5) |
| <b>Final Olfactory Evaluation</b>                                                                                                                                                                                           |                                       |                                                   |                   |                     |
| Evolution of the wine in the glass                                                                                                                                                                                          |                                       | Unchanged (1) to Evolving (5)                     |                   | (1) (2) (3) (4) (5) |
| Duration of the wine fragrance                                                                                                                                                                                              |                                       | Short (1) to Long (5)                             |                   | (1) (2) (3) (4) (5) |
| <b>Global Evaluation</b>                                                                                                                                                                                                    |                                       |                                                   |                   |                     |
| <i>Dislike a lot ( ) Dislike a little ( ) Do not like nor dislike ( ) Like a little ( ) Like a lot ( )</i>                                                                                                                  |                                       |                                                   |                   |                     |
| Below are several emotional terms. Check all the terms that characterize this wine.                                                                                                                                         |                                       |                                                   |                   |                     |
| Pleasant ( )                                                                                                                                                                                                                | Aggressive ( )                        | Joyful ( )                                        | Passionate ( )    | Desirable ( )       |
| Daring ( )                                                                                                                                                                                                                  | Warm ( )                              | Chewable ( )                                      | Disappointing ( ) | Unpleasant ( )      |
| Elegant ( )                                                                                                                                                                                                                 | Amusing ( )                           | Cloying ( )                                       | Relaxed ( )       | Overwhelming ( )    |
| Euphoric ( )                                                                                                                                                                                                                | Interesting ( )                       | Light ( )                                         | Exhilarating ( )  | Melancholic ( )     |
| Peaceable ( )                                                                                                                                                                                                               | Greedy ( )                            | Sensual ( )                                       | Surprising ( )    | Sickening ( )       |
